# Supplementary material for: Control of Cydia pomonella (L.) (Lepidoptera: Tortricidae) in apple orchards using the mating disruption technique
Source: PeerJ. 2025 Oct 23;13:e20226. doi: 10.7717/peerj.20226 (PMC12554307; doi:10.7717/peerj.20226)
Supplement: Supplemental Information 1 [file peerj-13-20226-s001.xlsx]

## Sheet: Orchard 1
		Trap count - Number of adults
		Pheromone-treated 1	Control 1
	2023-04-18	0	0
	2023-04-25	0	0
	2023-05-02	0	0
	2023-05-09	0	0
	2023-05-16	0	2
	2023-05-23	5	42
	2023-05-30	3	31
	2023-06-06	2	18
	2023-06-13	0	15
	2023-06-20	0	14
	2023-06-27	0	11
	2023-07-04	0	9
	2023-07-11	0	16
	2023-07-18	2	6
	2023-07-25	0	4
	2023-08-01	2	18
	2023-08-08	6	45
	2023-08-15	4	32
	2023-08-22	3	35
	2023-08-29	0	8
	2023-09-05	0	1
	2023-09-12	0	0
	2023-09-19	0	0
	2023-09-26	0	0	Hasat
	2023-10-03	0	0
	2023-10-10	0	0

## Sheet: Orchard 2
		Trap count - Number of adults
		Pheromone-treated 2	Control 2
	2023-04-18	0	0
	2023-04-25	0	0
	2023-05-02	0	0
	2023-05-09	0	0
	2023-05-16	0	0
	2023-05-23	6	63
	2023-05-30	4	30
	2023-06-06	1	17
	2023-06-13	0	14
	2023-06-20	0	12
	2023-06-27	0	7
	2023-07-04	0	8
	2023-07-11	0	7
	2023-07-18	3	10
	2023-07-25	1	5
	2023-08-01	1	15
	2023-08-08	4	48
	2023-08-15	1	28
	2023-08-22	3	18
	2023-08-29	0	10
	2023-09-05	0	1
	2023-09-12	0	1
	2023-09-19	0	0
	2023-09-26	0	0	Hasat
	2023-10-03	0	0
	2023-10-10	0	0

## Sheet: Orchard 3
		Trap count - Number of adults
		Pheromone-treated 3	Control 3
	2023-04-18	0	0
	2023-04-25	0	0
	2023-05-02	0	0
	2023-05-09	0	0
	2023-05-16	1	4
	2023-05-23	6	57
	2023-05-30	2	27
	2023-06-06	1	16
	2023-06-13	0	13
	2023-06-20	0	11
	2023-06-27	0	6
	2023-07-04	0	7
	2023-07-11	2	11
	2023-07-18	1	10
	2023-07-25	0	8
	2023-08-01	0	17
	2023-08-08	4	44
	2023-08-15	2	23
	2023-08-22	1	21
	2023-08-29	0	10
	2023-09-05	0	1
	2023-09-12	0	1
	2023-09-19	0	0
	2023-09-26	0	0	Hasat
	2023-10-03	0	0
	2023-10-10	0	0

## Sheet: Infestation rates Orchard 1,2,3
		1
			Pheromone-treated 1	Control 1
		2023-07-04	0	4
		2023-07-11	1	12
		2023-07-18	3	20
		2023-07-25	1	9
		2023-08-01	0	8
		2023-08-08	0	5
		2023-08-15	0	9
		2023-08-22	2	14
		2023-08-29	0	18
		2023-09-05	2	20
		2023-09-12	3	21
		2023-09-19	2	24
		2023-09-26	1	25
		2
			Pheromone-treated 2	Control 2
		2023-07-04	0	4
		2023-07-11	0	6
		2023-07-18	0	9
		2023-07-25	2	7
		2023-08-01	1	10
		2023-08-08	0	12
		2023-08-15	3	19
		2023-08-22	1	11
		2023-08-29	0	9
		2023-09-05	0	17
		2023-09-12	2	19
		2023-09-19	3	20
		2023-09-26	3	22
		3
			Pheromone-treated 3	Control 3
		2023-07-04	0	3
		2023-07-11	0	4
		2023-07-18	1	3
		2023-07-25	0	7
		2023-08-01	0	9
		2023-08-08	0	12
		2023-08-15	4	22
		2023-08-22	2	20
		2023-08-29	0	13
		2023-09-05	0	9
		2023-09-12	3	17
		2023-09-19	4	21
		2023-09-26	2	23
