# Supplementary material for: Control of Cydia pomonella (L.) (Lepidoptera: Tortricidae) in apple orchards using the mating disruption technique
Source: PeerJ. 2025 Oct 23;13:e20226. doi: 10.7717/peerj.20226 (PMC12554307; doi:10.7717/peerj.20226)
Supplement: Supplemental Information 2 [file peerj-13-20226-s002.xlsx]

## Sheet: Orchard 1
		Trap count - Number of adults
		Pheromone-treated 1	Control 1
	2024-04-21	0	0
	2024-04-28	0	0
	2024-05-05	0	9
	2024-05-12	0	12
	2024-05-19	0	18
	2024-05-26	3	25
	2024-06-02	4	44
	2024-06-09	5	62
	2024-06-16	1	38
	2024-06-23	0	22
	2024-06-30	0	8
	2024-07-07	0	33
	2024-07-14	5	76
	2024-07-21	3	54
	2024-07-28	0	37
	2024-08-04	0	18
	2024-08-11	0	8
	2024-08-18	0	2
	2024-08-25	0	1
	2024-09-01	0	5
	2024-09-08	0	1
	2024-09-15	0	0
	2024-09-22	0	0	Hasat
	2024-09-29	0	0
	2024-10-06	0	0

## Sheet: Orchard 2
		Trap count - Number of adults
		Pheromone-treated 2	Control 2
	2024-04-21	0	0
	2024-04-28	0	34
	2024-05-05	0	10
	2024-05-12	0	15
	2024-05-19	1	32
	2024-05-26	1	38
	2024-06-02	2	56
	2024-06-09	6	64
	2024-06-16	0	12
	2024-06-23	0	16
	2024-06-30	0	20
	2024-07-07	0	37
	2024-07-14	2	42
	2024-07-21	8	89
	2024-07-28	3	62
	2024-08-04	0	30
	2024-08-11	0	15
	2024-08-18	1	50
	2024-08-25	0	4
	2024-09-01	0	10
	2024-09-08	0	2
	2024-09-15	0	2
	2024-09-22	0	0	Hasat
	2024-09-29	0	0
	2024-10-06	0	0

## Sheet: Orchard 3
		Trap count - Number of adults
		Pheromone-treated 3	Control 3
	2024-04-21	0	0
	2024-04-28	0	0
	2024-05-05	0	0
	2024-05-12	0	1
	2024-05-19	0	2
	2024-05-26	0	22
	2024-06-02	1	34
	2024-06-09	3	54
	2024-06-16	5	72
	2024-06-23	0	5
	2024-06-30	0	6
	2024-07-07	0	8
	2024-07-14	0	10
	2024-07-21	2	25
	2024-07-28	4	69
	2024-08-04	1	34
	2024-08-11	0	12
	2024-08-18	0	2
	2024-08-25	0	1
	2024-09-01	0	0
	2024-09-08	0	0
	2024-09-15	0	0
	2024-09-22	0	0	Hasat
	2024-09-29	0	0
	2024-10-06	0	0

## Sheet: Infestation rates Orchard 1,2,3
SAYIM TARİHİ	BULAŞIK MEYVE SAYISI 100 MEYVEDE								1
	BAHÇE A	BAHÇE H	BAHÇE Y	KONTROL 1	KONTROL 2					Pheromone-treated 1	Control 1
2024-07-07	0	0	0	10	13				2024-07-07	0	10
2024-07-14	0	0	0	12	8				2024-07-14	0	12
2024-07-21	3	5	2	14	11				2024-07-21	3	14
2024-07-28	5	4	2	24	22				2024-07-28	5	24
2024-08-04	6	7	5	13	10				2024-08-04	6	13
2024-08-11	0	2	0	9	8				2024-08-11	0	9
2024-08-18	0	0	1	11	9				2024-08-18	0	11
2024-08-25	0	2	0	14	12				2024-08-25	0	14
2024-09-01	4	3	3	16	15				2024-09-01	4	16
2024-09-08	5	2	4	20	18				2024-09-08	5	20
2024-09-15	10	3	2	26	25				2024-09-15	10	26
2024-09-22	8	1	1	27	30				2024-09-22	8	27
2024-09-29
2024-10-06									2
2024-10-13										Pheromone-treated 2	Control 2
2024-10-20									2024-07-07	0	13
2024-10-27									2024-07-14	0	8
2024-11-03									2024-07-21	5	11
2024-11-10									2024-07-28	4	22
2024-11-17									2024-08-04	7	10
2024-11-24									2024-08-11	2	8
2024-12-01									2024-08-18	0	9
2024-12-08									2024-08-25	2	12
2024-12-15									2024-09-01	3	15
2024-12-22									2024-09-08	2	18
2024-12-29									2024-09-15	3	25
2025-01-05									2024-09-22	1	30
2025-01-12
									3
										Pheromone-treated 3	Control 3
									2024-07-07	0	11
									2024-07-14	0	10
									2024-07-21	2	13
									2024-07-28	2	11
									2024-08-04	5	19
									2024-08-11	0	10
									2024-08-18	1	10
									2024-08-25	0	15
									2024-09-01	3	13
									2024-09-08	4	16
									2024-09-15	2	22
									2024-09-22	1	25
